# Supplementary material for: The MTR4 helicase recruits nuclear adaptors of the human RNA exosome using distinct arch-interacting motifs
Source: Springer Nature journal article supplement (doi:10.1038/s41467-019-11339-x), 2019-07-29
Supplement: MOESM1 [file 41467_2019_11339_MOESM1_ESM.pdf]

## **SUPPLEMENTARY INFORMATION**

**The MTR4 helicase recruits nuclear adaptors of the human RNA  
exosome using distinct arch-interacting motifs**

**Lingaraju et al.**

# Supplementary Figure 1: Vertebrate specific N-terminal insertion in NVL interacts with MTR4

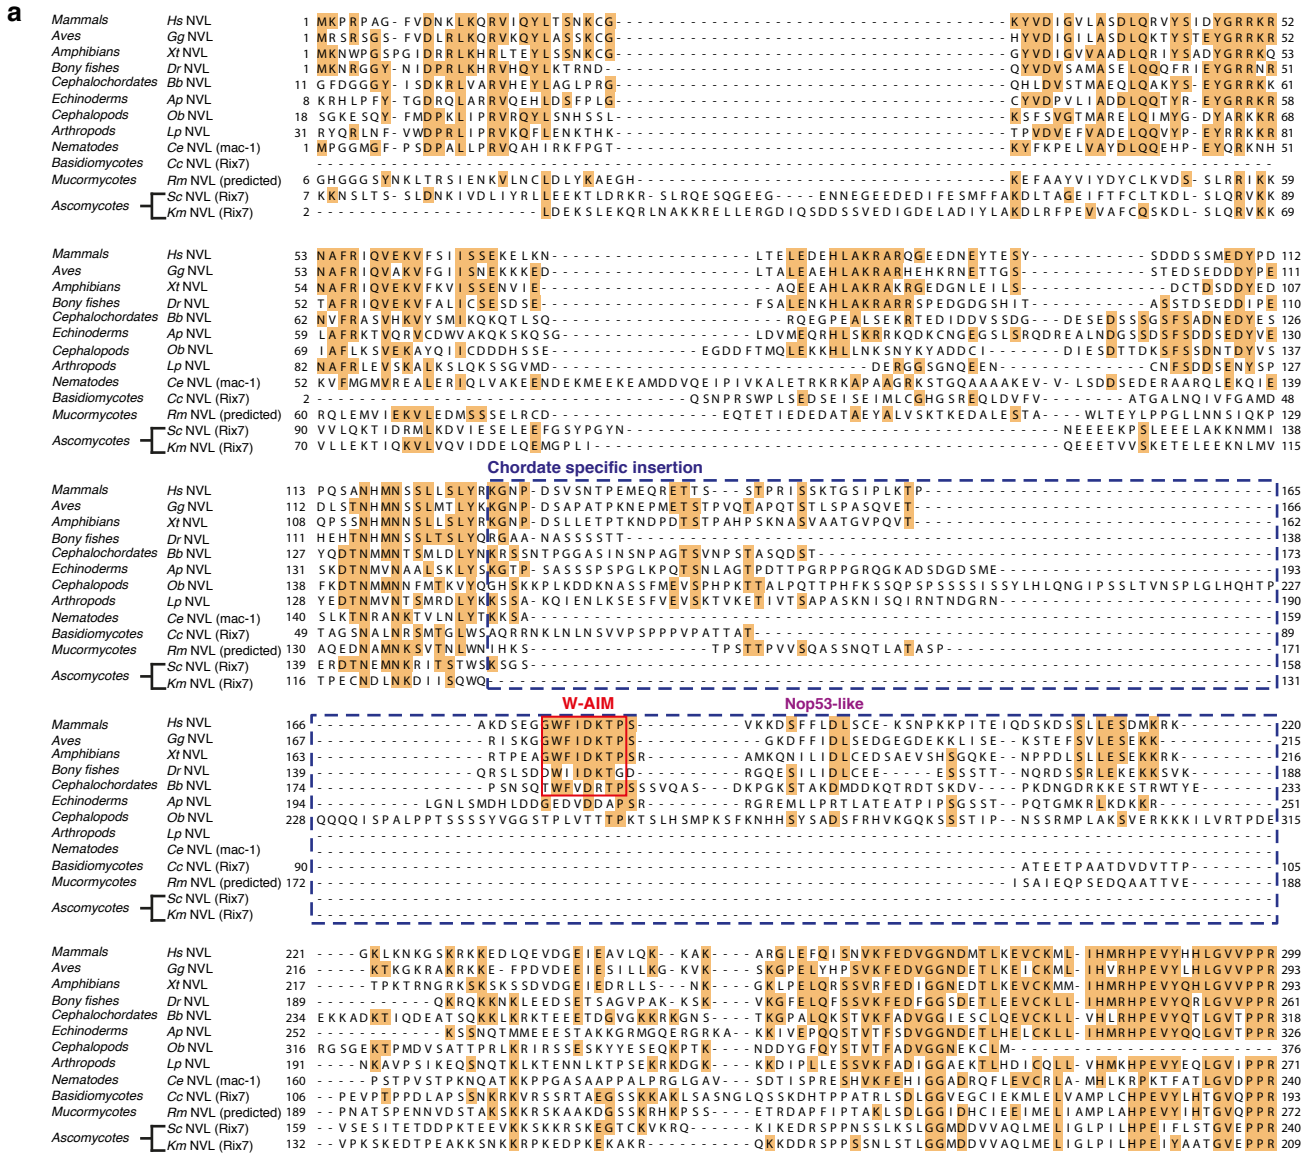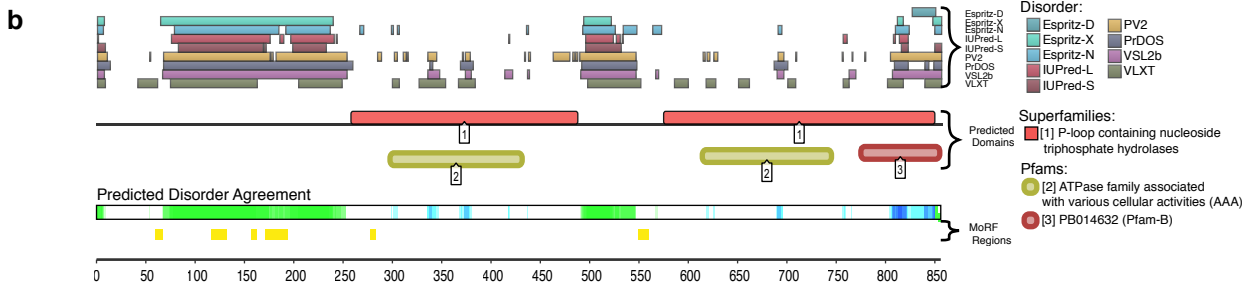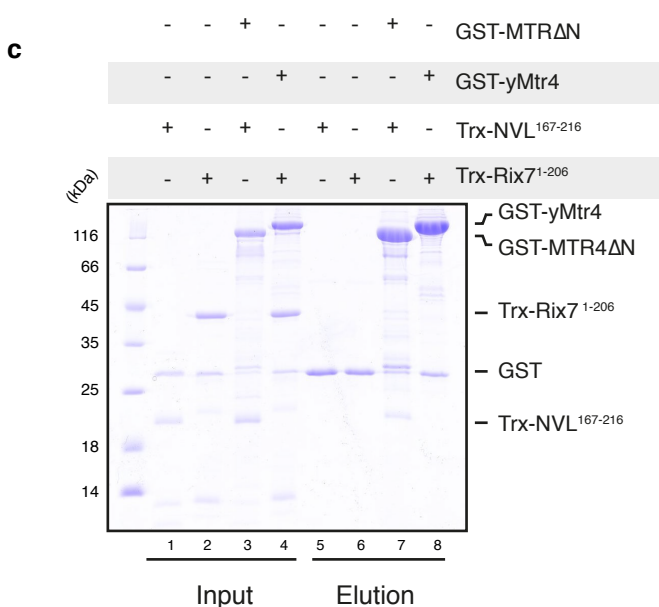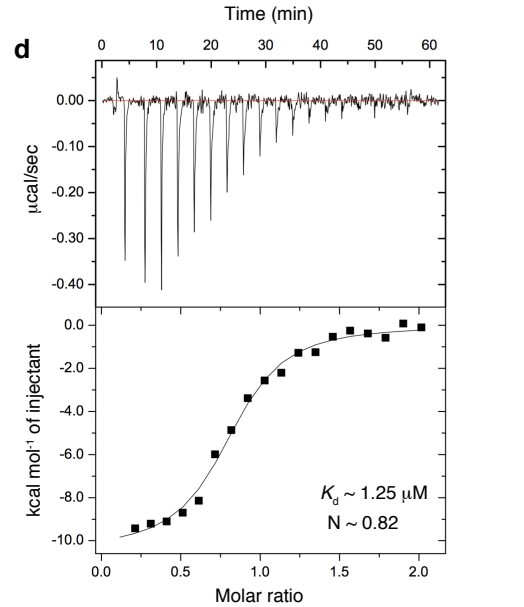



**Supplementary Figure 1** (a) Sequence alignment of N-termini of representative vertebrate and fungal NVL sequences, highlighting the chordate specific insertion (blue dashed box), the W-AIM (red box) and a Nop53 (LFX $\phi$ D) like region (purple). The sequences were obtained from the NCBI database and aligned using the T-coffee server<sup>1</sup>. *Hs* stands for *Homo sapiens*, *Gg* for *Gallus gallus*, *Xt* for *Xenopus tropicalis*, *Dr* for *Danio rerio*, *Bb* for *Branchiostoma belcheri*, *Ap* for *Acanthaster planci*, *Ob* for *Octopus bimaculoides*, *Lp* for *Limulus polyphemus*, *Ce* for *Caenorhabditis elegans*, *Cc* for *Coprinopsis cineria*, *Rm* for *Rhizopus microsporus*, *Sc* for *Saccharomyces cerevisiae*, and *Km* for *Kluyveromyces marxianus*. (b) Disorder prediction of human NVL as obtained from the D<sup>2</sup>P<sup>2</sup> database<sup>2</sup>. The region of NVL that is commonly predicted to be disordered by multiple algorithms is colored in bright green. (c) Protein co-precipitations by pull down assays. GST tagged MTR4 $\Delta$ N or yMtr4 were incubated with the vertebrate specific NVL insertion, Trx-NVL<sup>167-216</sup> and the N-terminus of Rix7, Trx-Rix7<sup>1-206</sup>, respectively before co-precipitation with glutathione sepharose beads. A total of 3% of the input (left) and 30% of the eluates (right) were analyzed on 15% SDS-PAGE gels and visualized by staining with coomassie brilliant blue. (d) ITC experiment of MTR4 $\Delta$ N with NVL<sup>167-216</sup>. The filled squares show reference corrected titration of NVL<sup>167-216</sup> into the MTR4 $\Delta$ N containing cell. The number of calculated binding sites (N), and dissociation constants ( $K_d$ ) are shown in the inset.

## Supplementary Figure 2: NMR analysis of the MTR4 KOW domain

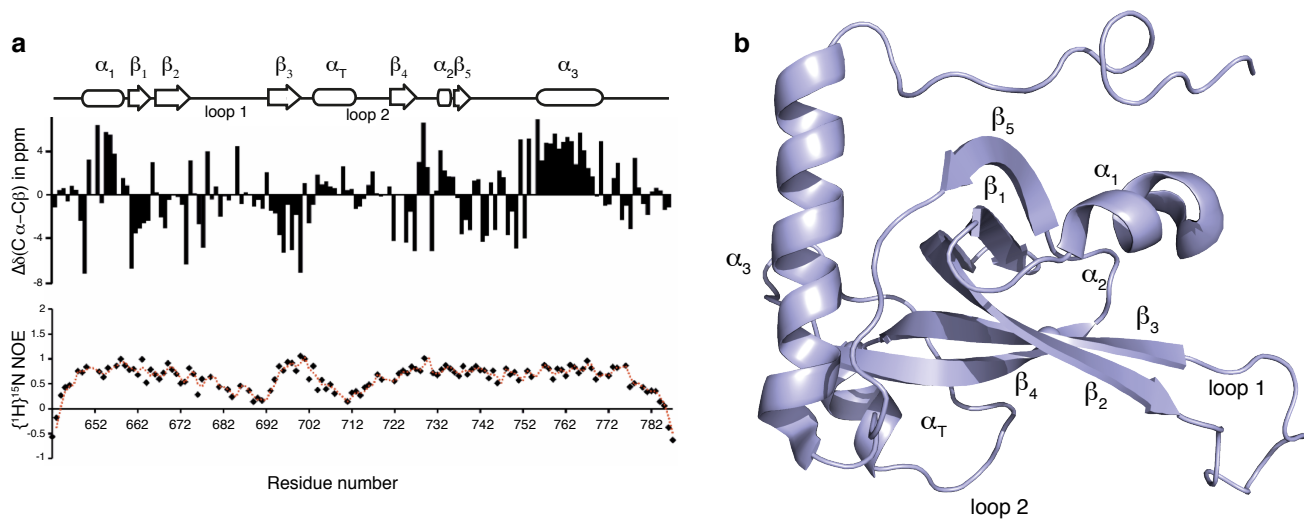

**Supplementary Figure 2** (a) Upper bar chart shows secondary carbon chemical shifts of MTR4 KOW plotted against its primary sequence. The clusters of positive bars  $>2$  represent  $\alpha$ -helices and the clusters of negative bars  $>2$  represent  $\beta$ -strands. The scheme above shows a summary of secondary structure elements as derived from the analysis, and elements are labeled for comparison with panel b. The bottom chart shows a heteronuclear NOE plot of the MTR4 KOW demonstrating the residue-resolved rigidity along the primary sequence. Note that the two prominent dips are located within loops 1 and 2. (b) Secondary structure features of the KOW domain obtained from NMR analysis mapped on to the KOW domain from the crystal structure of MTR4 (PDB 6IEH)<sup>3</sup>.

**Supplementary Figure 3: NVL and Nop53 interact with MTR4 KOW in a similar manner**

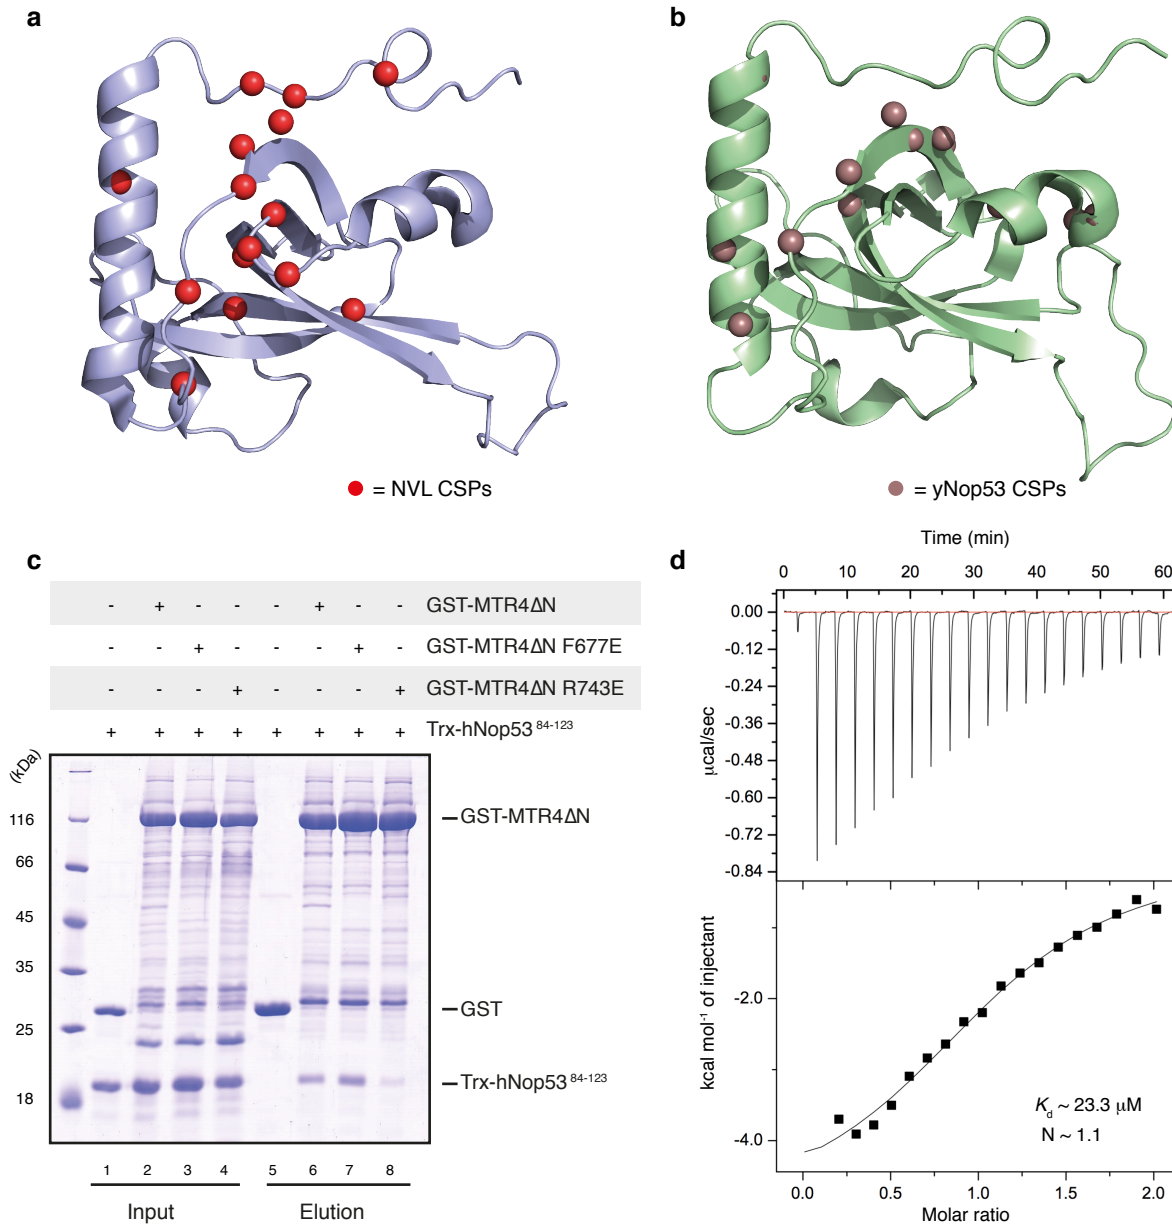

**Supplementary Figure 3** (a) Structural model of MTR4 KOW (PDB 6IEH)<sup>3</sup> showing regions of significant backbone chemical shift perturbation (CSPs) upon NVL titration highlighted as red spheres. (b) yMtr4 KOW (PDB 5OOQ) showing significant CSPs (orange spheres) upon yNop53 titration as reported by Falk et al<sup>4</sup>. (c) Protein co-precipitations by pull down assays. GST tagged MTR4ΔN or the corresponding MTR4ΔN mutants were incubated with the AIM containing region of human Nop53 (Trx-hNop53<sup>84-123</sup>) before co-precipitation with glutathione sepharose beads. A total of 1% of the input (left) and 30% of the eluates (right) were analyzed on 15% SDS-PAGE gels and visualized by staining with coomassie brilliant blue. (d) ITC experiment of MTR4 KOW with hNop53<sup>84-123</sup>. The filled squares show reference corrected titration of hNop53<sup>84-123</sup> into the MTR4 KOW containing cell. The number of calculated binding sites (N), and dissociation constants ( $K_d$ ) are shown in the inset.

**Supplementary Figure 4: Features of the NVL-MTR4 crystal structure**

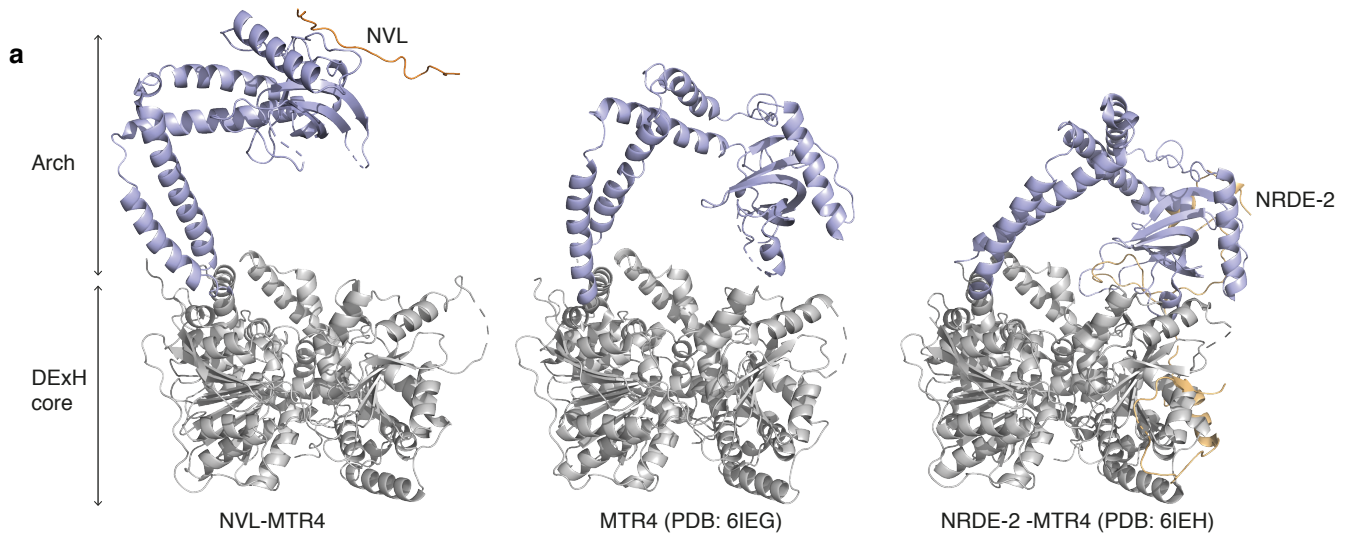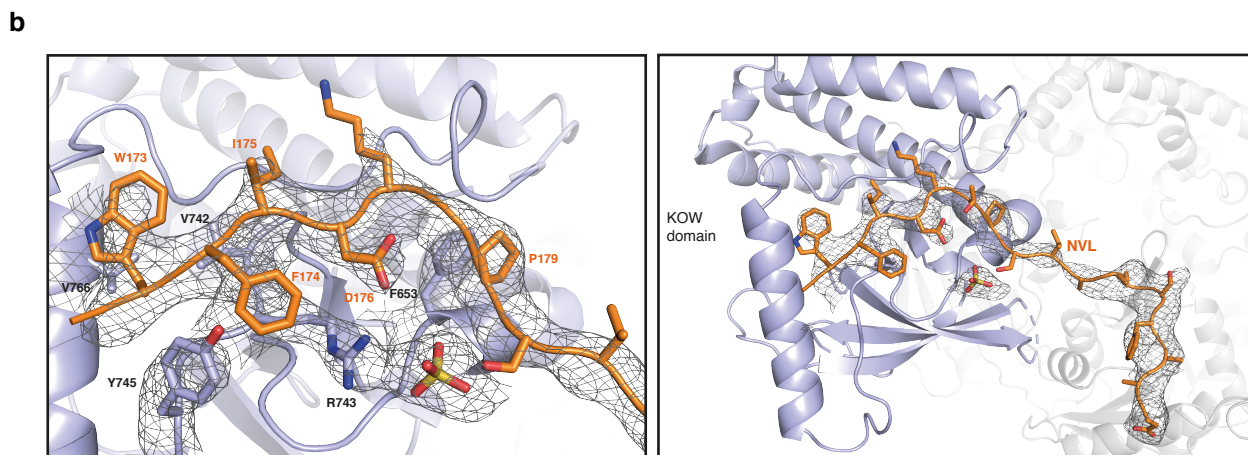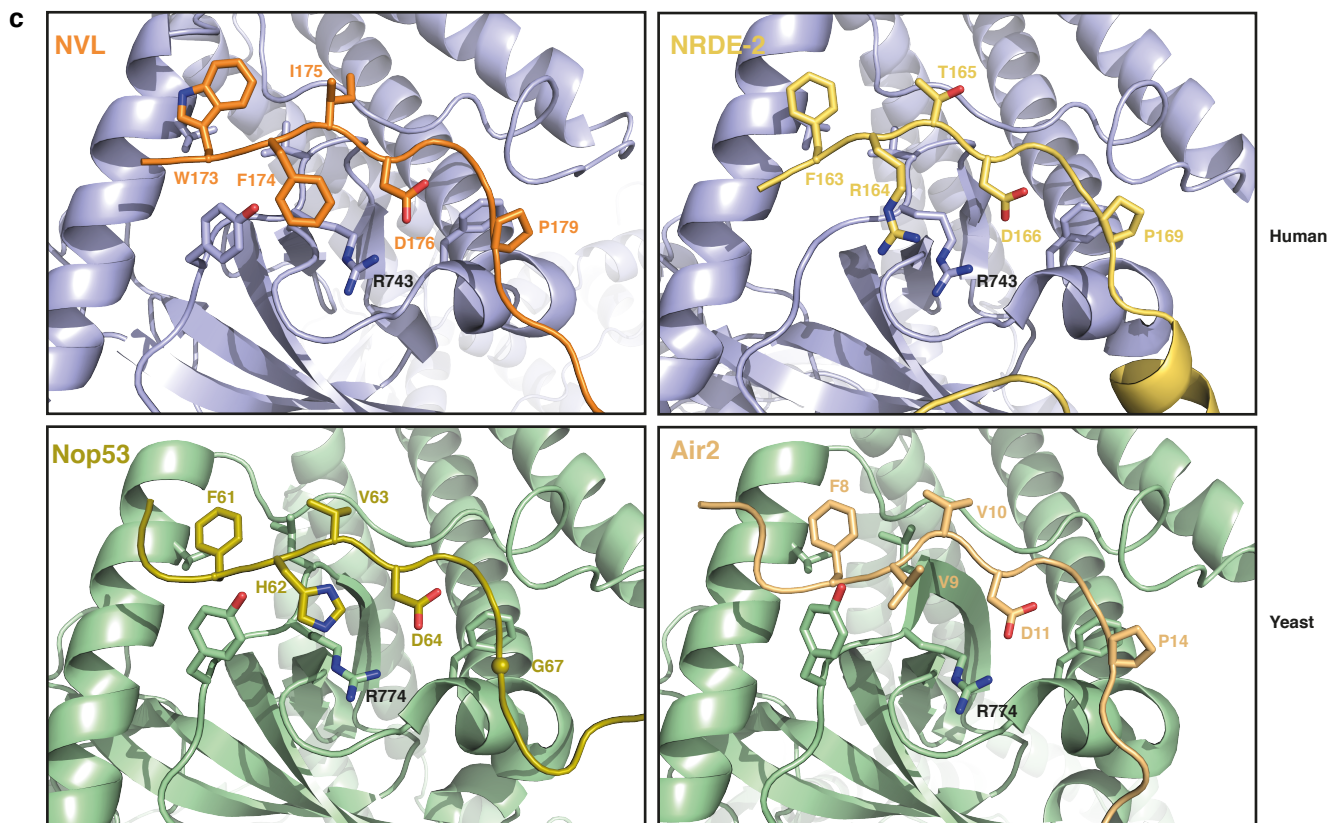

**Supplementary Figure 4** (a) Comparison of the crystal structure of the NVL-MTR4 complex with crystal structure of MTR4 alone and the NRDE-2-MTR4 complex (PDB 6IEG and 6IEH)<sup>3</sup>. The structures were aligned based on the DExH core region (colored in grey) to represent the difference in orientation of the arch region (colored in light blue) with respect to the DExH core. (b) Zoom-in view of the interactions between MTR4 KOW domain (light blue) and NVL (orange) as displayed in Fig. 3d. The model is overlaid with the refined 2mFo-DFc map (grey mesh) showing the density for NVL and the interacting residues of MTR4. The residues of interest are labeled and the map is contoured at 1.0 $\sigma$ . (c) Zoom in view of MTR4-NVL crystal structure showing the ordered region of NVL (orange). The model is overlaid with the 2mFo-DFc omit map calculated in PHENIX omitting the NVL residues. The map is contoured at 1.0 $\sigma$ . (d) Zoom-in view of the KOW-AIM interfaces in NVL-MTR4, NRDE-2-MTR4 (PDB 6IEH<sup>3</sup>), Nop53-Mtr4 (PDB 5OOQ<sup>4</sup>) and Trf4-Air2-Mtr4 (PDB 4U4C<sup>5</sup>) crystal structures. KOW domains of the human MTR4 and yeast Mtr4 are colored in light blue and green respectively. NVL, NRDE-2, Nop53 and Air2 are colored in orange, yellow orange, olive and pale orange respectively and the residues of interest are labeled.



**Supplementary Figure 5: Features of the NVL-MTR4 crystal structure and structure based mutagenesis**

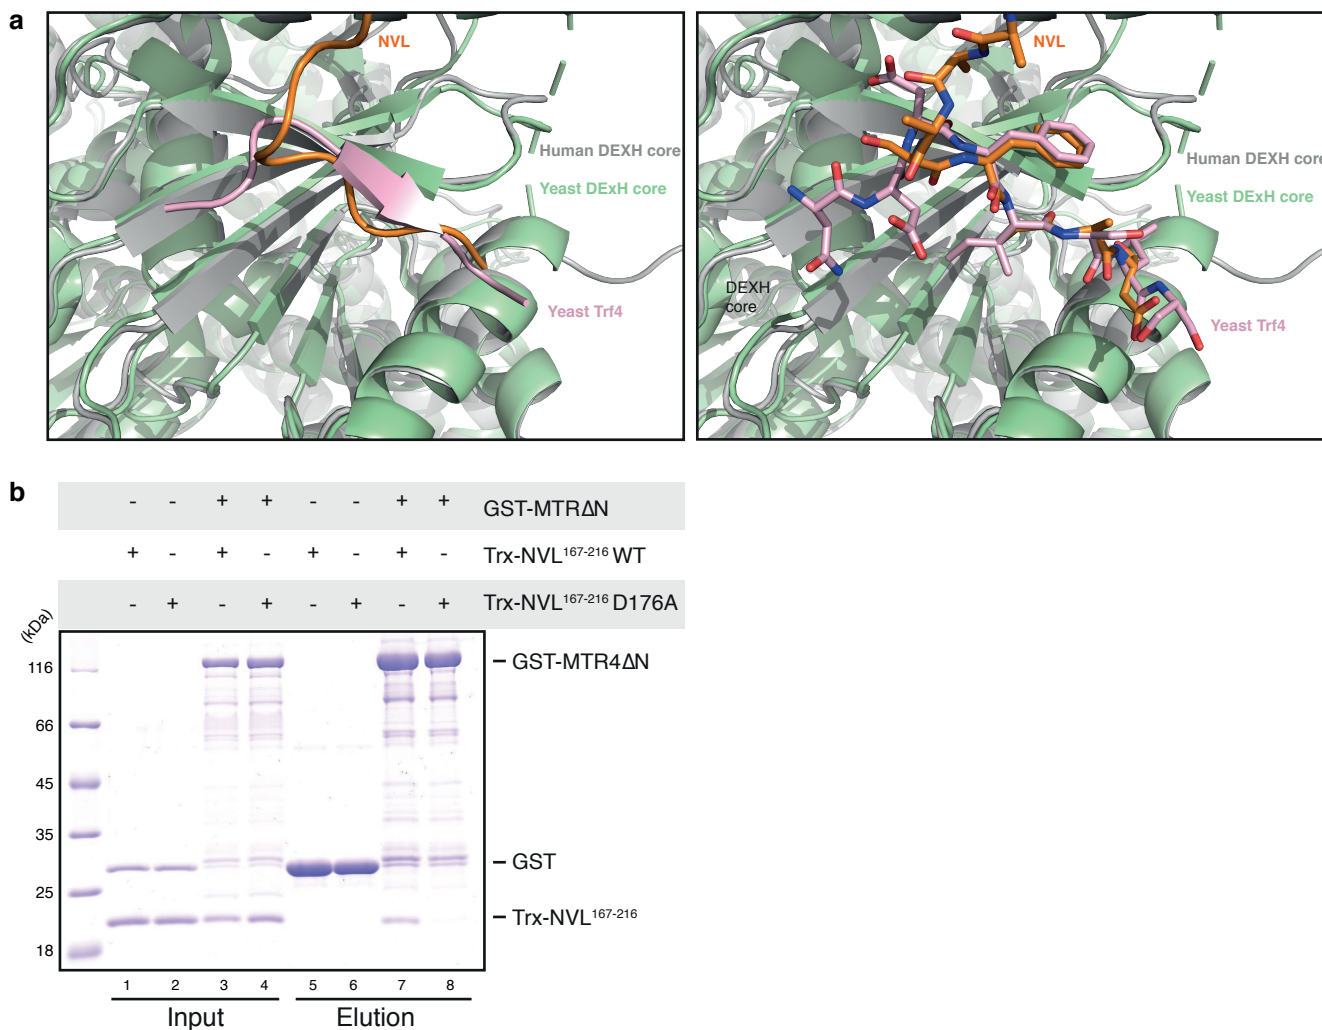

**Supplementary Figure 5** (a) Superposition of DEXH cores NVL-MTR4 (grey) and Trf4-Air2-Mtr4 (light green; PDB 4U4C<sup>5</sup>) showing that the NVL fragment (orange) from a symmetry related molecule aligns with the Trf4 fragment in Trf4-Air2-Mtr4 structure. NVL and Trf4 are shown in cartoon representation (left panel) and in stick representation (right panel) for clarity. (b) Protein co-precipitations by pull down assays. GST tagged MTR4ΔN was incubated with Trx-NVL<sup>167-216</sup> WT or Trx-NVL<sup>167-216</sup> D176A before co-precipitation with glutathione sepharose beads. A total of 1% of the input (left) and 30% of the eluates (right) were analyzed on 12% SDS-PAGE gels and visualized by staining with coomassie brilliant blue.

# Supplementary Figure 6: ZCCHC8 harbors both canonical and non-canonical AIMs

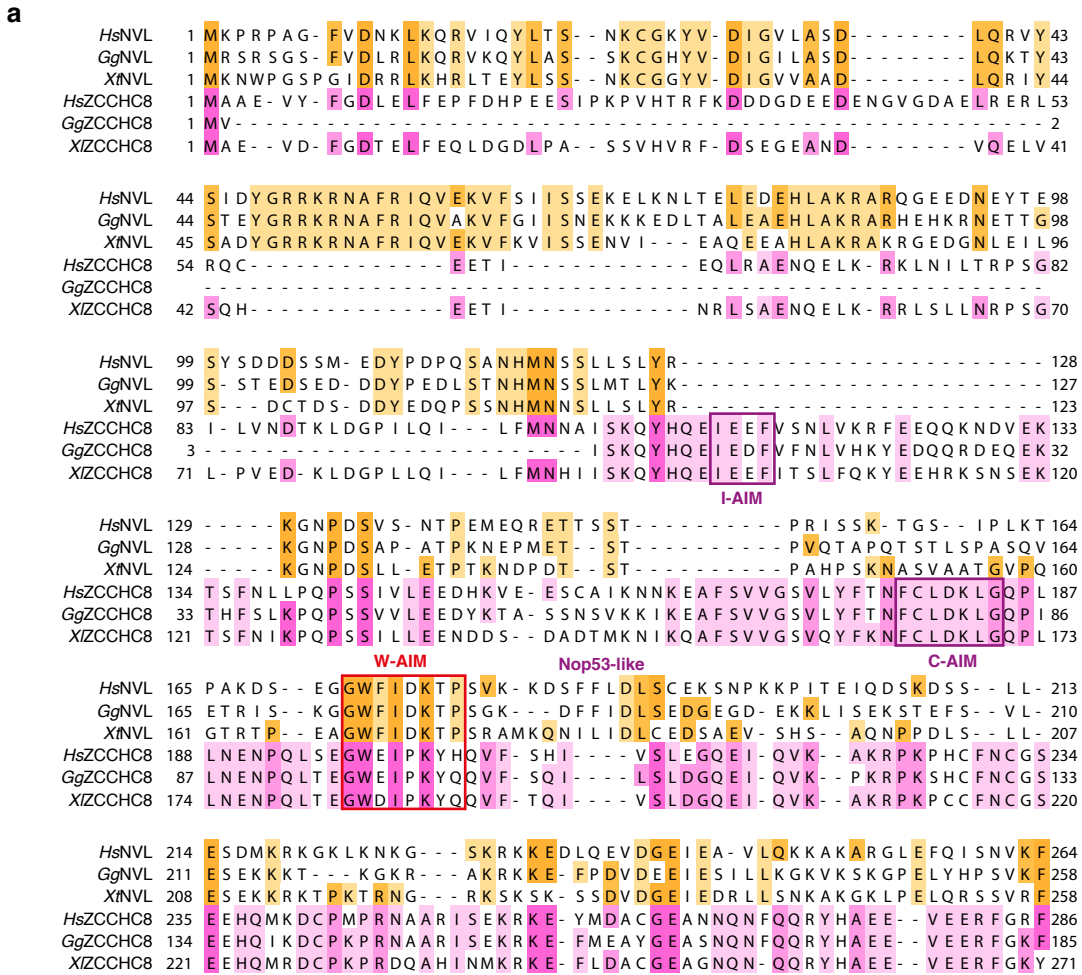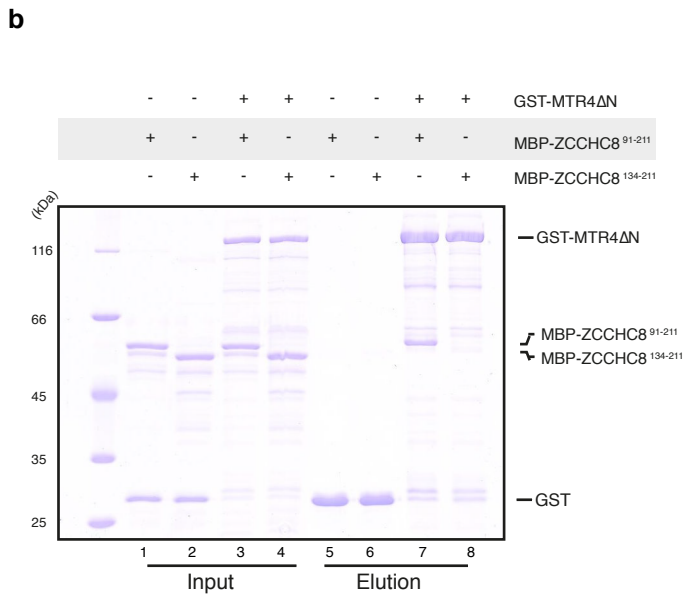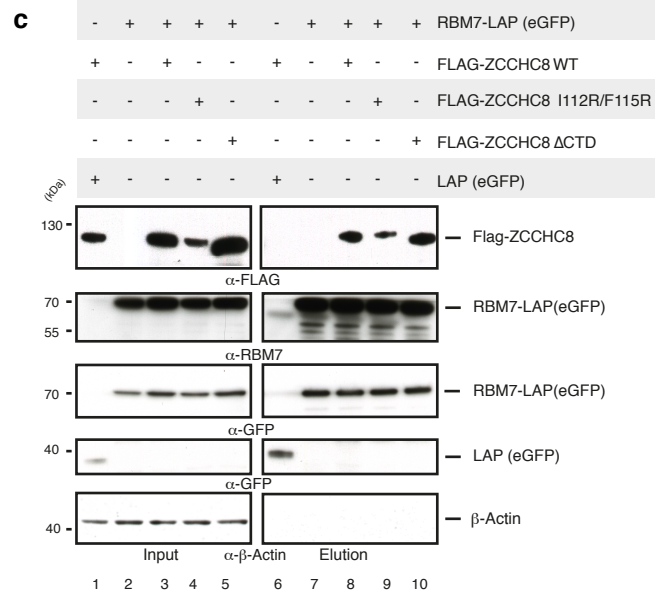

**Supplementary Figure 6** (a) Sequence alignment of the N-termini of NVL (orange) and ZCCHC8 (pink), highlighting W-AIM (red box), the respective Nop53-like C-AIM (LFX $\phi$ D) and ZCCHC8 specific I-AIM (purple boxes). The sequences were obtained from the UniProt database and aligned using the T-coffee server<sup>1</sup>. *Hs* stands for *Homo sapiens*, *Gg* for *Gallus gallus*, *Xt* for *Xenopus tropicalis* and, *Xl* for *Xenopus laevis*. (b) Protein co-precipitations by pull down assays. GST tagged MTR4 $\Delta$ N was incubated with MBP-ZCCHC8<sup>91-211</sup> or MBP-ZCCHC8<sup>134-211</sup> before co-precipitation with glutathione sepharose beads. A total of 1% of the input (left) and 30% of the eluates (right) were analyzed on 10% SDS-PAGE gels and visualized by staining with coomassie brilliant blue. (c) Cellular co-IP assay. FLAG-tagged ZCCHC8 constructs (WT, IF-mutant, CTD-deletion) were transiently expressed in cells stably expressing RBM7-LAP. After precipitation of RBM7 taking advantage of the LAP tag, a total of 0.5% of the input (left) and 8.0% of the eluates (right) were analyzed on 4-12% SDS-PAGE gel followed by western blotting. The primary antibody used is indicated below the panel.





**Supplementary Figure 7** (a) Structural superposition of MTR4 KOW model (light blue) (PDB 6IEH<sup>3</sup>) with structures of SMN tudor domain (gold) (PDB 1G5V)<sup>6</sup>, TDRD3 tudor domain (turquoise) (PDB 3S6W)<sup>7</sup>, SPF30 tudor domain (smudge green) (PDB 4A4F)<sup>8</sup> and Pcl tudor domain (orange) (PDB 2XK0)<sup>9</sup>. The superpositions were performed in PyMOL graphics system, version 2.2 (Schrödinger LLC). (b) Sequence alignment of representative MTR4 KOW (blue) and tudor (purple) domains, highlighting hydrophobic core residues (brown box) and putative substrate binding residues (red box) of tudor domains. The hydrophobic core residues conserved between KOW and tudor sequences are marked with brown rectangles (\*). The residues of interest in MTR4 KOW, Phe677 and Arg743, are marked by green and red asterisks respectively. The sequences were obtained from UniProt database and aligned using the T-coffee server<sup>1</sup>. *Hs* stands for *Homo sapiens*, *Ce* for *Caenorhabditis elegans*, *Dm* for *Drosophila melanogaster*, and *Sc* for *Saccharomyces cerevisiae*. (c) Cartoon and surface representation of MTR4 KOW (light blue) (PDB 6IEH)<sup>3</sup> highlighting the AIM interacting arginine (red) and putative ligand binding phenylalanine (green).

**Supplementary Figure 8 : Arch interacting regions of NVL and ZCCHC8 do not influence MTR4 activity.**

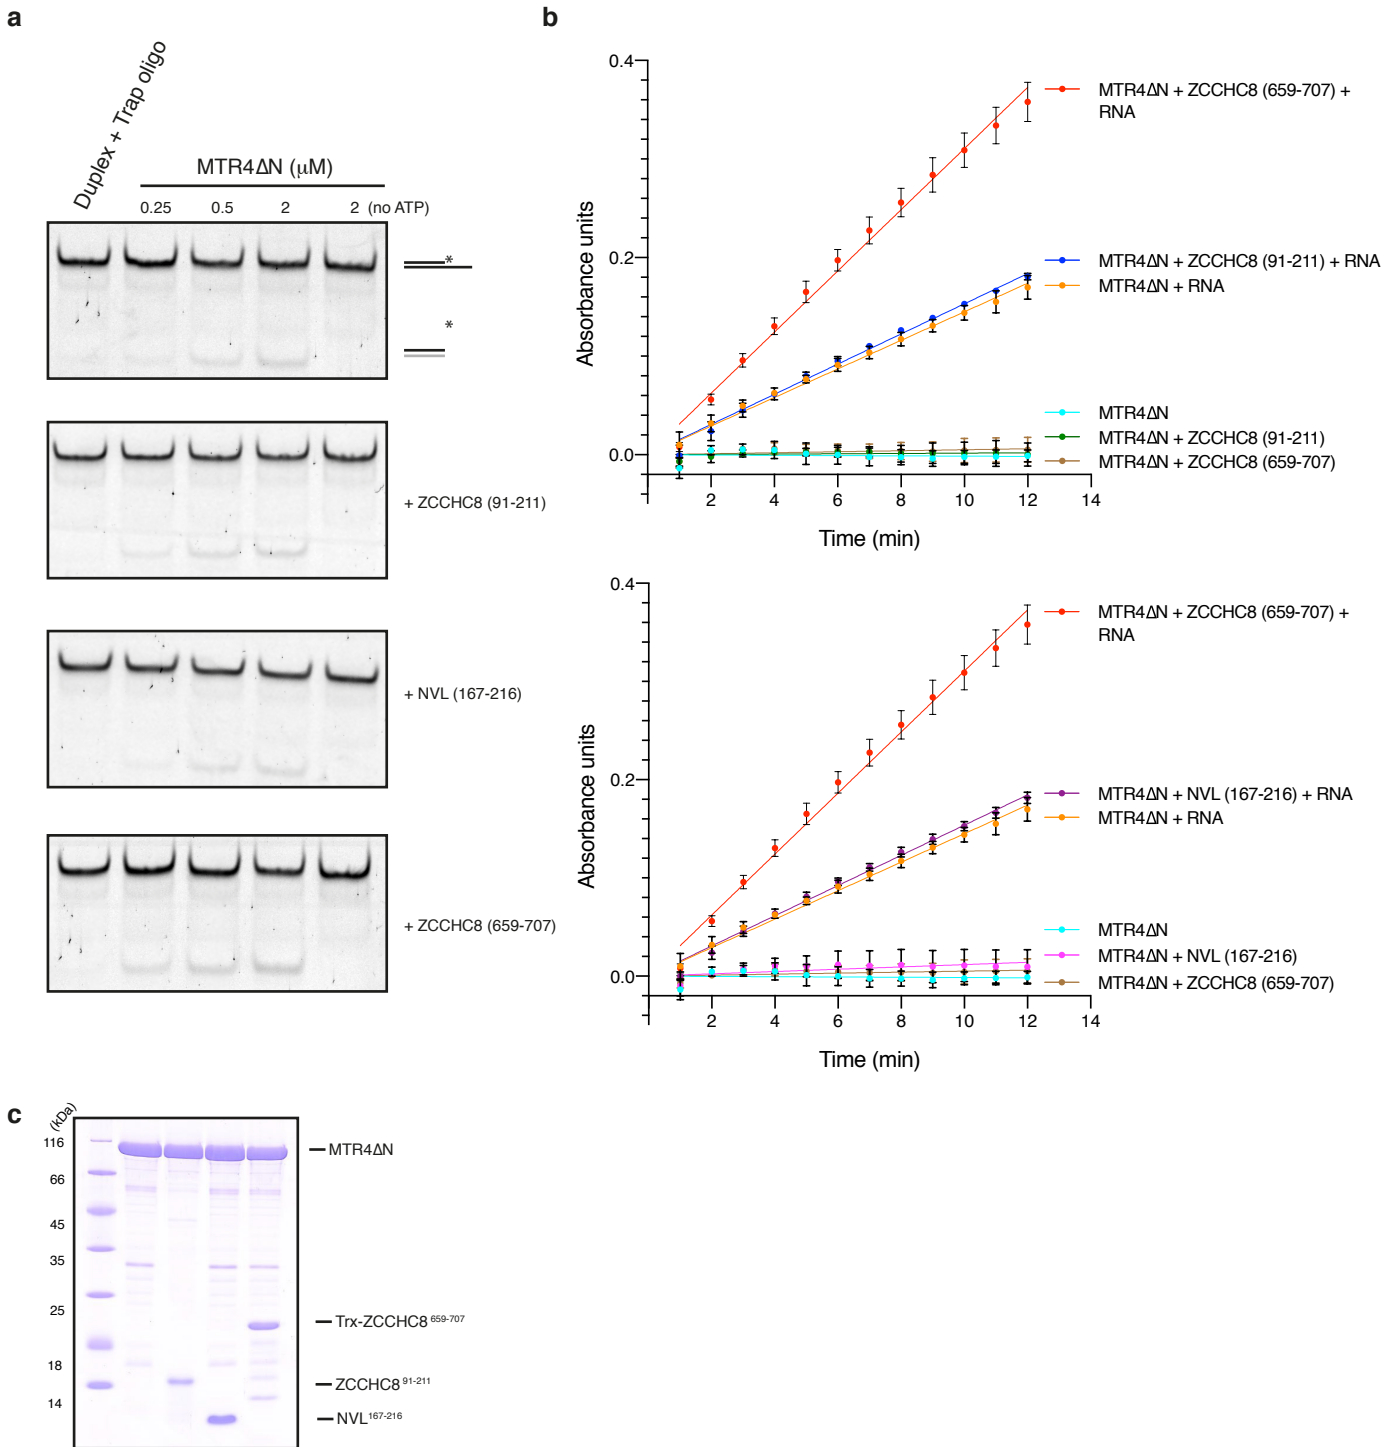

**Supplementary Figure 8** (a) End point helicase activity assay of MTR4 $\Delta$ N, MTR4 $\Delta$ N with KOW-binding regions of NVL and ZCCHC8, and MTR4 with C-terminal domain of ZCCHC8 on RNA duplex substrates. (b) Time course of ATP hydrolysis by MTR4 $\Delta$ N alone or in presence of RNA and KOW-binding regions of ZCCHC8 (upper panel) and NVL (lower panel). The data show mean (n=3) with standard deviation plotted as error bars. ZCCHC8 C-terminal domain, which is known to stimulate ATPase activity of MTR4<sup>10</sup>, is used as positive control (c) Coomassie stained SDS-PAGE gel showing the proteins used in the helicase and ATPase assays.

## Supplementary Figure 9 : Stereo view of electron density at NVL-MTR4 interface

**a**

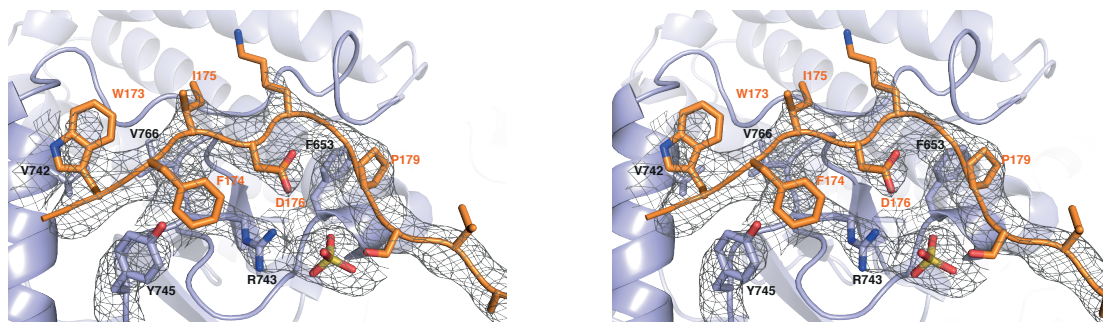

**b**

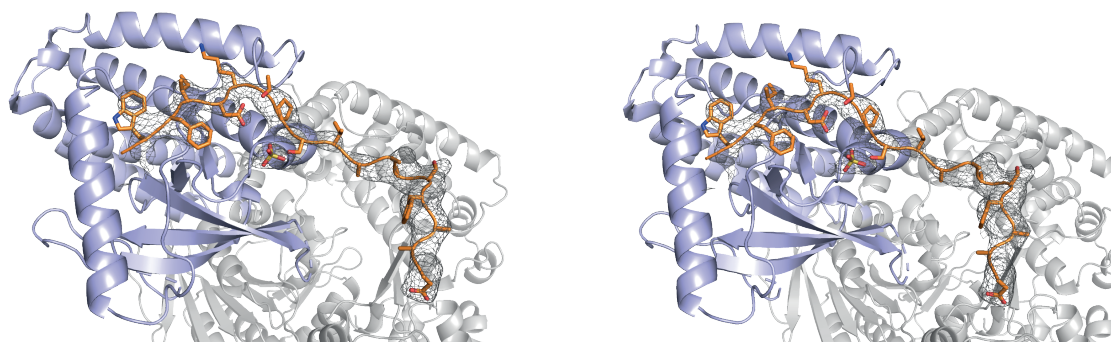

**Supplementary Figure 9** (a) Stereo zoom-in view of the interactions between MTR4 KOW domain (light blue) and NVL (orange) as displayed in Fig. 3d. The model is overlaid with the refined 2mFo-DFc map (grey mesh) showing the density for NVL and the interacting residues of MTR4. The residues of interest are labeled and the map is contoured at 1.0σ. (b) Stereo zoom in view of MTR4-NVL crystal structure showing the ordered region of NVL (orange). The model is overlaid with the 2mFo-DFc omit map calculated in PHENIX omitting the NVL residues. The map is contoured at 1.0σ.



Supplementary Figure 10: Uncropped gels & blots

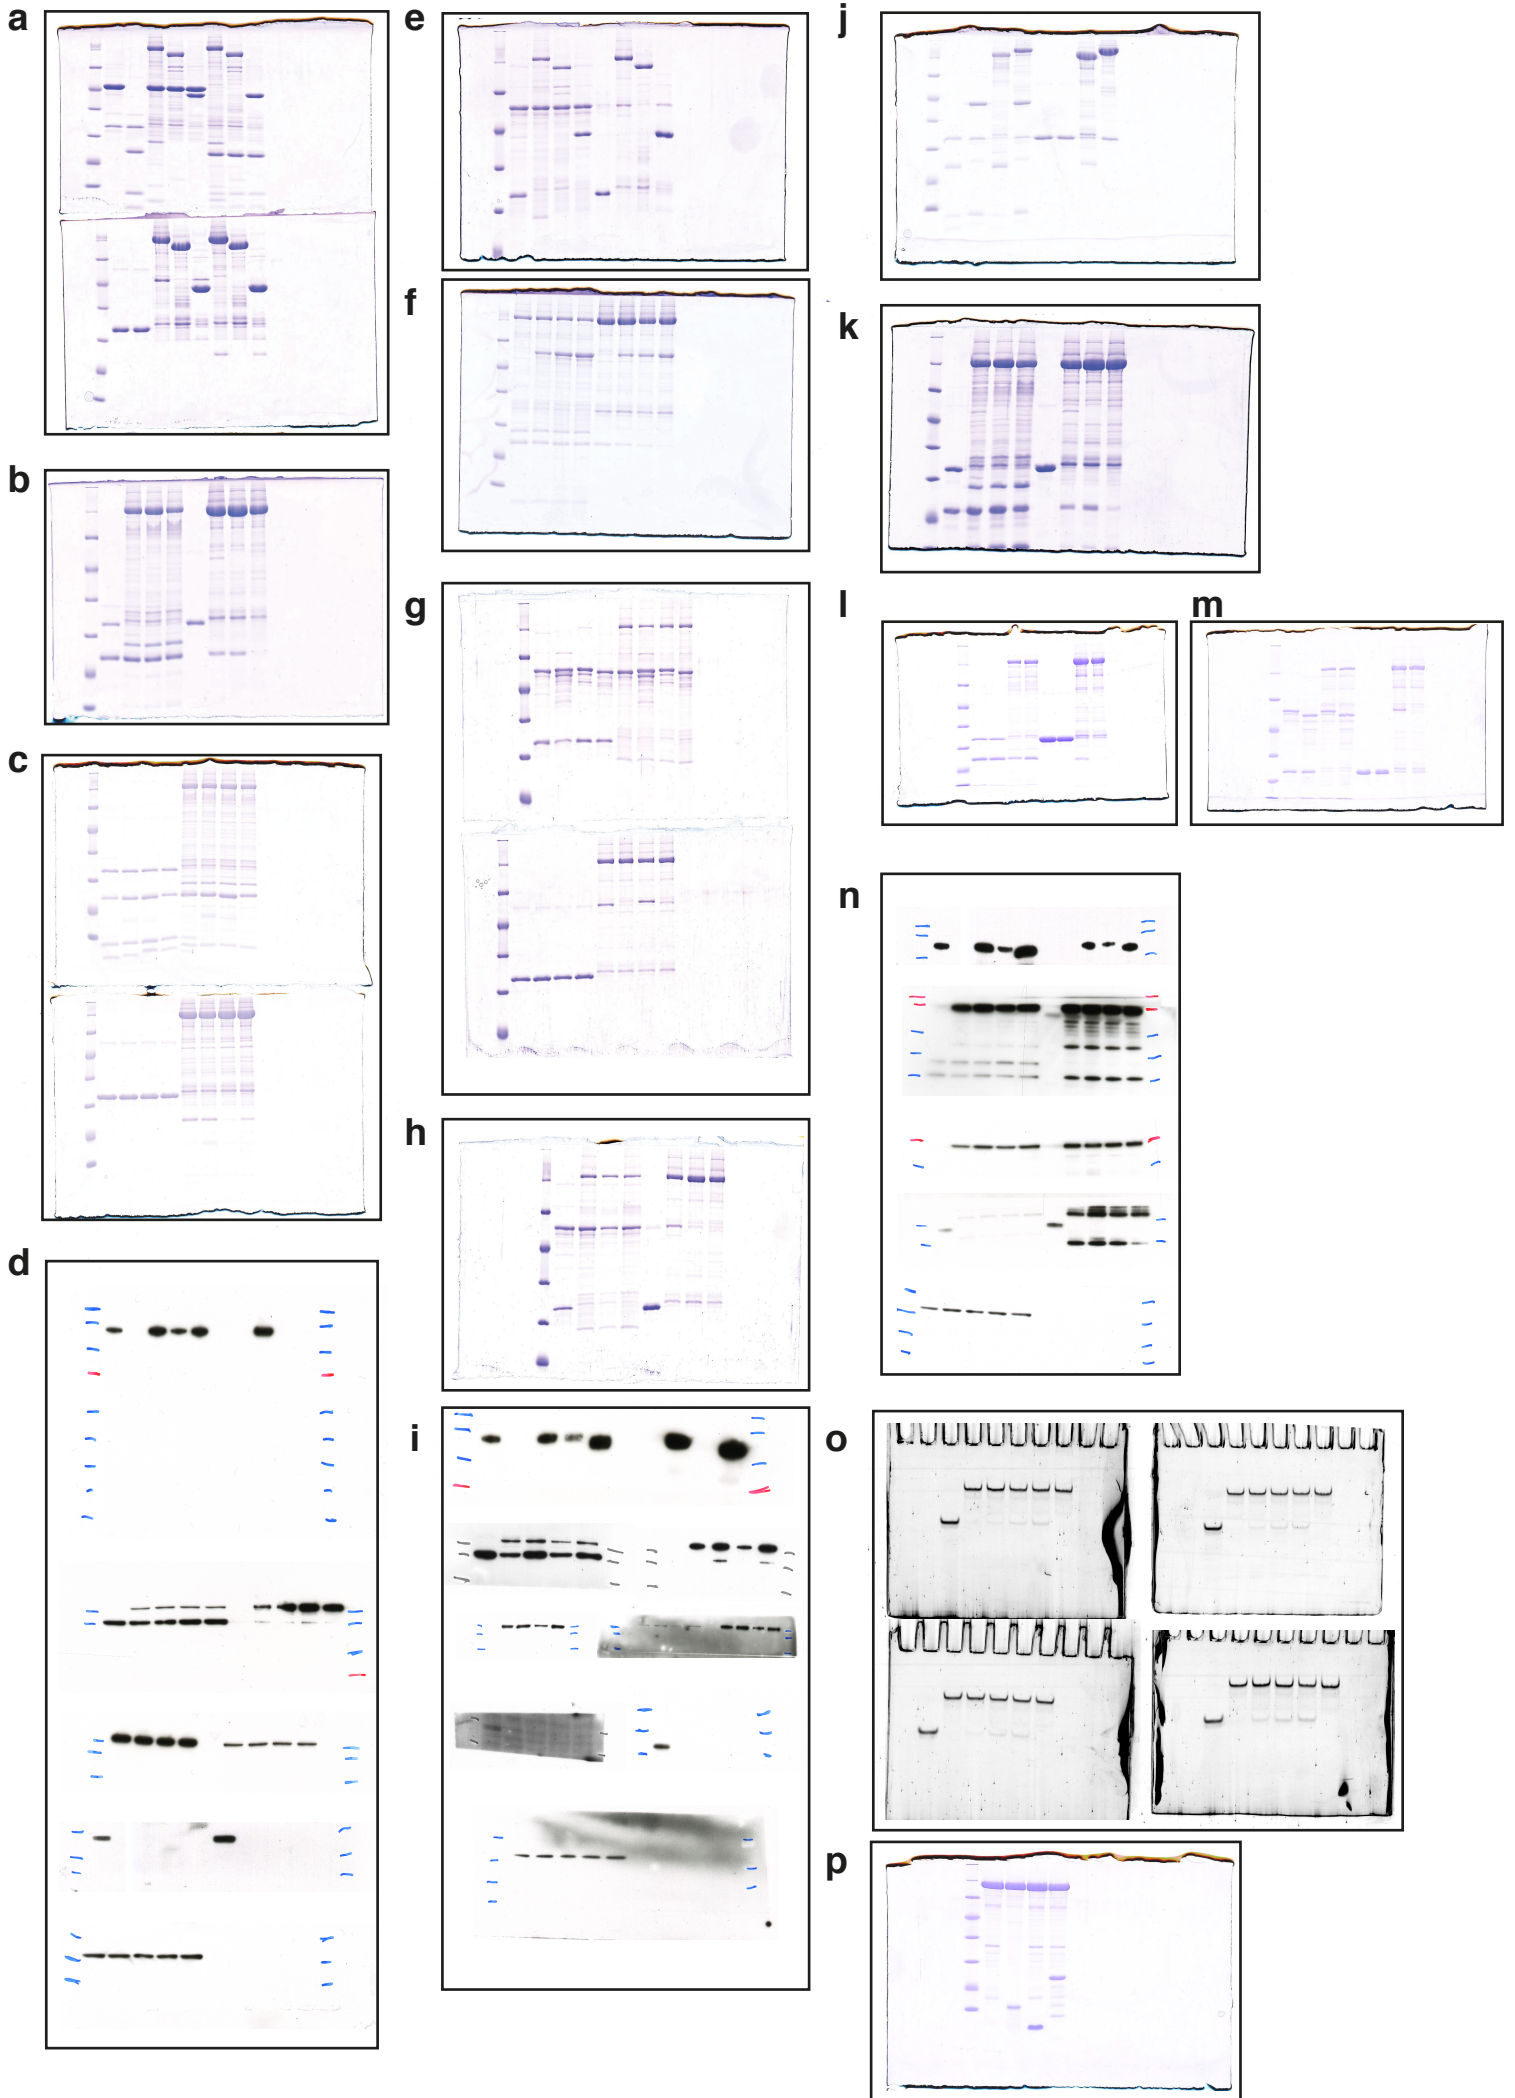

**Supplementary Figure 10** (a) Fig.1b (b) Fig.2d (c) Fig.3b (d) Fig.3e (e) Fig.4b (f) Fig.4d (g) Fig.5b (h) Fig.5c (i) Fig.5d (j) Supplementary Fig.1c (k) Supplementary Fig.3c (l) Supplementary Fig.5b (m) Supplementary Fig.6b (n) Supplementary Fig.6c (o) Supplementary Fig.8a (p) Supplementary Fig.8c.

**Supplementary Table 1: List of primers for generating constructs used in this study.**

| Primer                                  | Sequence (5'-3')                                                                |
|-----------------------------------------|---------------------------------------------------------------------------------|
| MTRAN-Fwd                               | ccaggggcccgactcgatgattttggaagaagcccaggatagaagagtc                               |
| MTRAN-Rev                               | cagaccgccaccgactgcttacaagtagaggctggcagcaaacacaatatctctcttg                      |
| MTRAN $\Delta$ arch-Fwd                 | gctttttcagttccagaatgttattagctctggctcgggacaggccgttattcagctggatgacc               |
| MTRAN $\Delta$ arch-Rev                 | ggtcattccagctgaataacggcctgtcccagccagagctaaatacattctggaactgaaaaaagc              |
| MTR4 KOW-Fwd                            | ccaggggcccgactcgatgcacaaacaaaatactgcttacctttctac                                |
| MTR4 KOW-Rev                            | cagaccgccaccgactgcttaattctgaatgccatcatcaataggg                                  |
| NVL(1-266)-Fwd                          | ccaggggcccgactcgatgaagcccagacctgcagggttcg                                       |
| NVL(1-266)-Rev                          | cagaccgccaccgactgcttaattctcaaaactcacgttgagatctgg                                |
| NVL(167-216)-Fwd                        | ccaggggcccgactcgatgaaagattctgaaggaggatggtttattgac                               |
| NVL(167-216)-Rev                        | cagaccgccaccgactgcttaactctccaaagagaagaatctttgaatcc                              |
| NVL(167-216)-eYFP-<br>cterm fusion-Fwd  | tcaaaagattctctcttttgagagtgatggcagcatggtgagcaaggcgag                             |
| NVL(167-216) eYFP cterm<br>fusion-Rev   | ctcgcccttgctcaccatgctgccaactctccaaagagaagaatctttga                              |
| MTRAN F677E-Fwd                         | tgactttggctggggagtagtggtgaatgagtcaaaaaagtcaaatgtaag                             |
| MTRAN F677E-Rev                         | cttaacattgactttttgactcattcaccactactccccagccaaagtca                              |
| MTRAN R743E-Fwd                         | gtcttttagaatgtaaagctcaacactgctgatagcagacaggag                                   |
| MTRAN R743E-Rev                         | ctcctgtctgctatcagcagtggtgagctttacattcctaaagac                                   |
| MTRAN for crystallization-<br>Fwd       | ccaggggcccgactcggaaaactgtatttccagggaacagatgaaccatttttgaaagaagc                  |
| NVL(167-216)<br>F186A/D189R-Fwd         | gtgtaaagaaagacagtgtttctgcccctgcatgtgagaaaagtaatcc                               |
| NVL(167-216)<br>F186A/D189R-Rev         | ggattacttttctcacatgacaggcgcaagaaagcactgtctttctttacac                            |
| NVL(167-216) W173A-<br>Fwd              | ccaggggcccgactcgaaagattctgaaggaggagcgtttattgac                                  |
| NVL(167-216) I175E-Fwd                  | ccaggggcccgactcgaaagattctgaaggaggatggtttgaagac                                  |
| NVL FL-Fwd                              | taagcagatatcatgaagcccagacctgcag                                                 |
| NVL FL-Rev                              | tgcttagcggccgcccggctgagggactcct                                                 |
| NVL FL W173A/I175E-<br>Fwd              | ctgccaagattctgaaggaggagcgtttgaggacaaaacccaagtgtaaag                             |
| NVL FL W173A/I175E-<br>Rev              | ctttacacttggggtttgtccgaaaacgctcctcctcagaatctttggcag                             |
| NVL FL $\Delta$ W-AIM-Fwd               | ccattcccttgaagaccctgccaagattctgaaggaaagttaaagaaagacagttttcttgacctg              |
| NVL FL $\Delta$ W-AIM-Rev               | cagggtcaagaaaaactgtcttttactctcctcagaatctttggcaggggtctcaagggaatgg                |
| ZCCHC8(91-211)-Fwd                      | aagttctgttccaggggcccattggtgacctatattacagattctattcatgaacaatg                     |
| ZCCHC8(91-211)-Rev                      | ccccagaacatcaggttaattggcgttaacaatgtggctgaagacttgatggtacttg                      |
| ZCCHC8(91-211)-eYFP<br>cterm fusion-Fwd | catcaagtcttcagccacattgttggcagcatggtgagcaaggcgag                                 |
| ZCCHC8(91-211)-eYFP<br>cterm fusion-Rev | ctcgcccttgctcaccatgctccaacaatgtggctgaagacttgatg                                 |
| ZCCHC8(91-211)<br>F178A/D181R-Fwd       | gaagcgggtgcccatttacgaaggcaagcattagtaaaatacaggacacttctacaaca                     |
| ZCCHC8(91-211)<br>F178A/D181R-Rev       | tggttaggaagtgtctgtattttactaatgcttgcctcgtaaattggggcaaccgcttc                     |
| ZCCHC8(91-211)<br>W198A/K202E-Rev       | gcaaagcaccgtgtaaacatgtggctgaagacttgatggtactcgggtattcagctcctcgaaag<br>ctg        |
| ZCCHC8(91-211)/FL<br>I112R/F115R-Fwd    | ttcatgaacaatgctatttcaaagcaatatcatcaagaaagaggaacgtgtatcaaattagtaaaaagat<br>ttgag |
| ZCCHC8(91-211)/FL<br>I112R/F115R-Rev    | ctcaaatcttttactaaattgatacacgttctctcttcttgatgatattgctttgaaatagcattgttcatgaa      |
| ZCCHC8 FL-Fwd                           | taagcagatatcatggccgagagggtattt                                                  |
| ZCCHC8 FL-Rev                           | tgcttagcggccgctcagaggcctttttgtttctg                                             |

|                      |                                                         |
|----------------------|---------------------------------------------------------|
| yMtr4-Fwd            | ccaggggcccgactcgatggattctactgatctgttcgatgttttcgagg      |
| yMtr4-Rev            | cagaccgccaccgactgcttataaatacaagaaccagcagatacgatactctatg |
| Rix7(1-206)-Fwd      | ccagggagcagcctcgatggttaaagtaaagtcgaaaaagaactcatt        |
| Rix7(1-206)-Rev      | gcaaagcaccggcctcgtaggatttcagagacgaattaggtggagatc        |
| hNop53(84-123)-Fwd   | ccaggggcccgactcgatggaaaaactcttcttcgtggacactg            |
| hNop53(84-123)-Rev   | cagaccgccaccgactgcttattctcgaggatgaggtaacc               |
| NVL D176A-Fwd        | ccaggggcccgactcgatgaaagattctgaaggaggatggtttattgccaaaac  |
| ZCCHC8(134-211)-Fwd  | aagttctgtccaggggccatgacttccttaacttttgccccagc            |
| ZCCHC8 ΔCTD-Rev      | tgcttagcggccgctatgaattttagtgccggtg                      |
| ZCCHC8 (659-707)-Fwd | ccaggggcccgactcgatgcctatacctgacatgagcaaattgcaac         |
| ZCCHC8 (659-707)-Rev | cagaccgccaccgactgcttattattcagaggccttttgttttctgc         |

\*All primers contain overhangs to facilitate ligation independent cloning



## Supplementary References

1. Di Tommaso, P. et al. T-Coffee: a web server for the multiple sequence alignment of protein and RNA sequences using structural information and homology extension. *Nucleic Acids Res* **39**, W13-7 (2011).
2. Oates, M.E. et al. D(2)P(2): database of disordered protein predictions. *Nucleic Acids Res* **41**, D508-16 (2013).
3. Wang, J. et al. NRDE2 negatively regulates exosome functions by inhibiting MTR4 recruitment and exosome interaction. *Genes Dev* (2019).
4. Falk, S. et al. Structural insights into the interaction of the nuclear exosome helicase Mtr4 with the preribosomal protein Nop53. *RNA* **23**, 1780-1787 (2017).
5. Falk, S. et al. The molecular architecture of the TRAMP complex reveals the organization and interplay of its two catalytic activities. *Mol Cell* **55**, 856-867 (2014).
6. Selenko, P. et al. SMN tudor domain structure and its interaction with the Sm proteins. *Nat Struct Biol* **8**, 27-31 (2001).
7. Liu, K. et al. Crystal structure of TDRD3 and methyl-arginine binding characterization of TDRD3, SMN and SPF30. *PLoS One* **7**, e30375 (2012).
8. Tripsianes, K. et al. Structural basis for dimethylarginine recognition by the Tudor domains of human SMN and SPF30 proteins. *Nat Struct Mol Biol* **18**, 1414-20 (2011).
9. Friberg, A., Oddone, A., Klymenko, T., Muller, J. & Sattler, M. Structure of an atypical Tudor domain in the Drosophila Polycomblike protein. *Protein Sci* **19**, 1906-16 (2010).
10. Puno, M.R. & Lima, C.D. Structural basis for MTR4-ZCCHC8 interactions that stimulate the MTR4 helicase in the nuclear exosome-targeting complex. *Proc Natl Acad Sci U S A* **115**, E5506-E5515 (2018).
